# Supplementary material for: A zero-background fluorescent probe for Hg2+ designed via the “covalent-assembly” principle
Source: Royal Society of Chemistry journal article supplement (doi:10.1039/c4ay01729c), 2014-01-01
Supplement: c4ay01729c1.pdf [file c4ay01729c1.pdf]

## Supplementary Information for

### A Zero-Background Fluorescent Probe for Hg<sup>2+</sup> Designed via the “Covalent-Assembly” Principle

Linlin Song,<sup>†</sup> Zuhai Lei,<sup>†</sup> Baoyan Zhang,<sup>†</sup> Zhiping Xu,<sup>†\*</sup> Zhong Li,<sup>†\*</sup> and Youjun Yang<sup>†\*</sup>

<sup>†</sup>Shanghai Key Laboratory of Chemical Biology, School of Pharmacy, East China University of Science and Technology, Meilong Road 130, Shanghai 200237, China

\* E-mail: youjunyang@ecust.edu.cn,

\* E-mail: zhipingxu@ecust.edu.cn,

\* E-mail: zhongli@ecust.edu.cn.

#### Table of Content

| Page# | Content                                                 |
|-------|---------------------------------------------------------|
| S2    | General methods                                         |
|       | Figure S1: Synthetic scheme of <b>Hg570</b>             |
|       | Procedures and product characterizations                |
| S3    | Figure S2: Selectivity study of <b>Hg570</b>            |
| S4    | Figure S3: <sup>1</sup> H-NMR of compound <b>Hg570</b>  |
| S5    | Figure S4: <sup>13</sup> C-NMR of compound <b>Hg570</b> |
| S6    | Figure S5: HR-MS of compound <b>Hg570</b>               |

## General methods

Chemicals including 1,2-ethanedithiol, PTSA, HEPES, perchlorate salts of various metal ions including  $\text{Hg}^{2+}$ ,  $\text{Mn}^{2+}$ ,  $\text{Ba}^{2+}$ ,  $\text{Pb}^{2+}$ ,  $\text{Zn}^{2+}$ ,  $\text{Cd}^{2+}$ ,  $\text{Co}^{2+}$ ,  $\text{Cu}^{2+}$ ,  $\text{Ni}^{2+}$ ,  $\text{Fe}^{3+}$ ,  $\text{Fe}^{2+}$  and  $\text{Ag}^{+}$  used in this work were purchased from Energy Chemicals, Ltd. Solvents of analytical grade including  $\text{CH}_2\text{Cl}_2$ , EtOAc, Petroleum Ether and toluene were purchased from Titan Scientific. All chemicals and solvents were used without further purification. Bottled water from Watsons was used for preparation of sample and buffer solutions. DMSO from Lingfeng Chemicals was used in preparation of the stock solution of **Hg570** and subsequent spectroscopic studies.

The  $^1\text{H}$ -NMR and  $^{13}\text{C}$ -NMR spectra were acquired on a Bruker AV-400 spectrometer. Chemical shifts were referenced to the residue solvent peaks and given in ppm. HRMS was acquired on a Micromass GCT spectrometer. UV-Vis absorption spectra were acquired on a SHIMADZU UV-2600 UV-vis spectrophotometer. Fluorescence emission spectra were acquired on a PTI-QM4 steady-state fluorimeter equipped with a 75 Watt Xenon arc-lamp and a R928 PMT. The excitation and emission slits were set to 2 nm and all emission spectra were corrected with respect to the PMT sensitivity at different wavelengths. Fluorescence titration studies were performed by addition of an aliquot of the stock solution of  $\text{Hg}^{2+}$  or other metal ions into a **Hg570** solution (10  $\mu\text{M}$ ) in HEPES solution (10 mM at pH = 7.4) with 5% DMSO using a micro-syringe.

The relative fluorescence quantum yield of **Pyronin B** was measured at room temperature with rhodamine B ( $\phi = 0.65$ ) as the reference.<sup>1</sup>

## Synthetic procedures and Compound Characterization

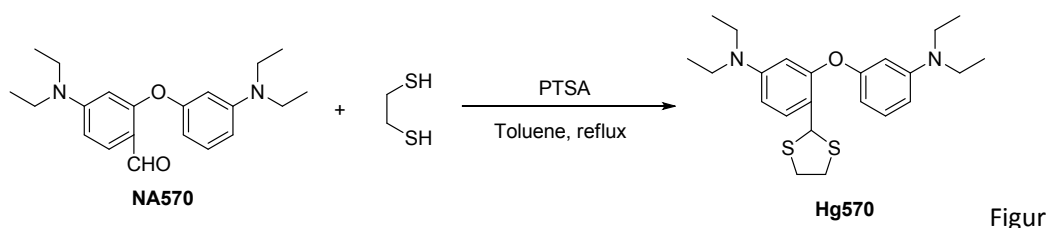

S1. The synthetic scheme of **Hg570**.

**Synthesis of 3-(3-(diethylamino)phenoxy)-4-(1,3-(dithiolan-2-yl)-N,N-diethylaniline (Hg570).** **NA570**<sup>2</sup> (0.5 g, 1.47 mmol), 1,2-Ethanedithiol (0.14 mL, 1.67 mmol) and p-toluenesulfonic acid (25.3 mg, 0.147 mmol) were heated to reflux in 20 mL of toluene with constant stirring for 10 minutes. Then the mixture was cooled to room temperature before mixed with deionized water (100 mL) and extracted with  $\text{CH}_2\text{Cl}_2$  (30 mL  $\times$  3). The  $\text{CH}_2\text{Cl}_2$  layer was dried with  $\text{MgSO}_4$  before the solid was filtered off. The filtrate was concentrated under reduced pressure to give a viscous residue, which was purified by a flash column using petroleum ether and EtOAc (20:1, v/v) as the eluent to afford **Hg570** (0.56 g, white solid) in a 92% yield.  $^1\text{H}$  NMR (400 MHz,  $\text{CDCl}_3$ ):  $\delta$  7.66 (d,  $J = 8.8$  Hz, 1H), 7.11 (dd,  $J = 8.1, 8.1$  Hz, 1H), 6.49 (dd,  $J = 8.8, 2.3$  Hz, 1H), 6.40 (dd,  $J = 8.1, 2.4$  Hz, 1H), 6.38 (t,  $J = 2.4$  Hz, 1H), 6.21 (d,  $J = 2.3$  Hz, 1H), 6.20 (dd,  $J = 8.1, 2.4$  Hz, 1H), 6.04 (s, 1H), 3.517-3.441 (m, 2H), 3.34 (q,  $J = 7.0$  Hz, 4H), 3.34-3.26 (m, 2H), 3.28 (q,  $J = 7.1$  Hz, 4H), 1.17 (t,  $J = 7.0$  Hz, 6H), 1.11 (t,  $J = 7.1$  Hz, 6H);  $^{13}\text{C}$  NMR (100 MHz,  $\text{CDCl}_3$ ):  $\delta$  159.3, 154.6, 149.3, 148.6, 129.9, 117.6, 108.1, 106.3, 104.2, 102.9, 101.5, 76.7, 49.5, 44.4, 39.8, 12.6. HRMS (m/z):  $[\text{M}+\text{H}]^+$  calculated for  $\text{C}_{23}\text{H}_{33}\text{N}_2\text{OS}_2$  at 417.2034, found 417.2037.

1. Kubin, R.F.; Fletcher, A.N. *J. Lumin.* **1982**, *27*, 455-462.
2. Lei, Z.; Yang, Y. *J. Am. Chem. Soc.*, **2014**, *136*, 6594-6597.

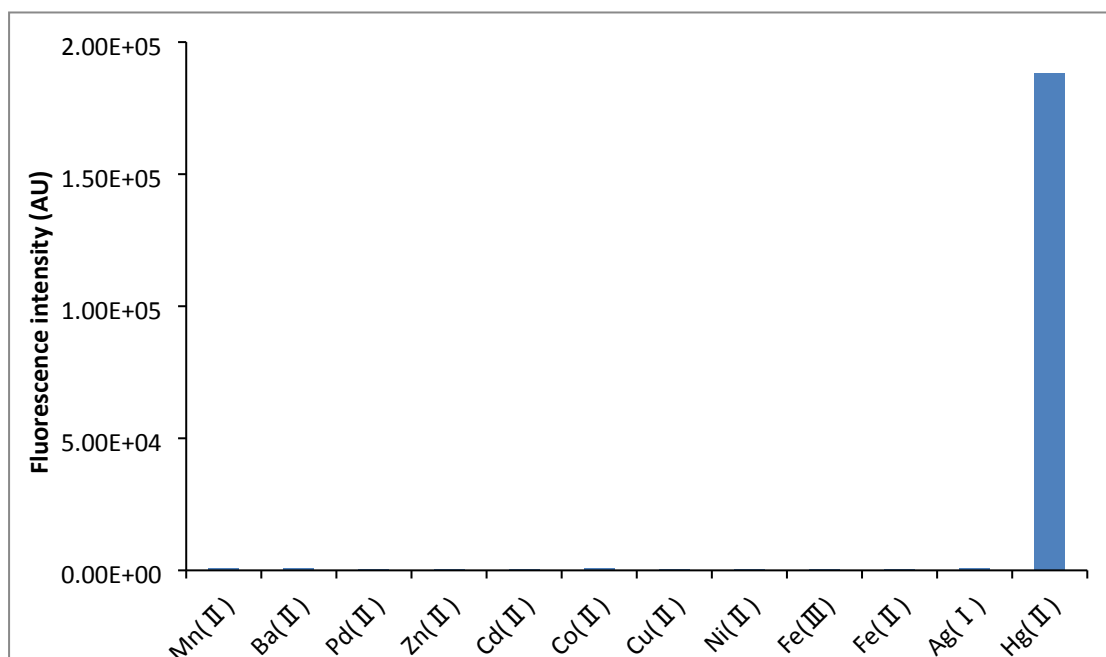

Figure S2. Selectivity study of **Hg570** (10  $\mu$ M) in HEPES buffer (10 mM with pH = 7.4) with 5% DMSO as co-solvent, against various potentially interfering transition metal ions. Hg(II) was at 9  $\mu$ M, all metal ions was at 100  $\mu$ M.

YYJ-LZH-122-H  
YYJ-LZH-122-H

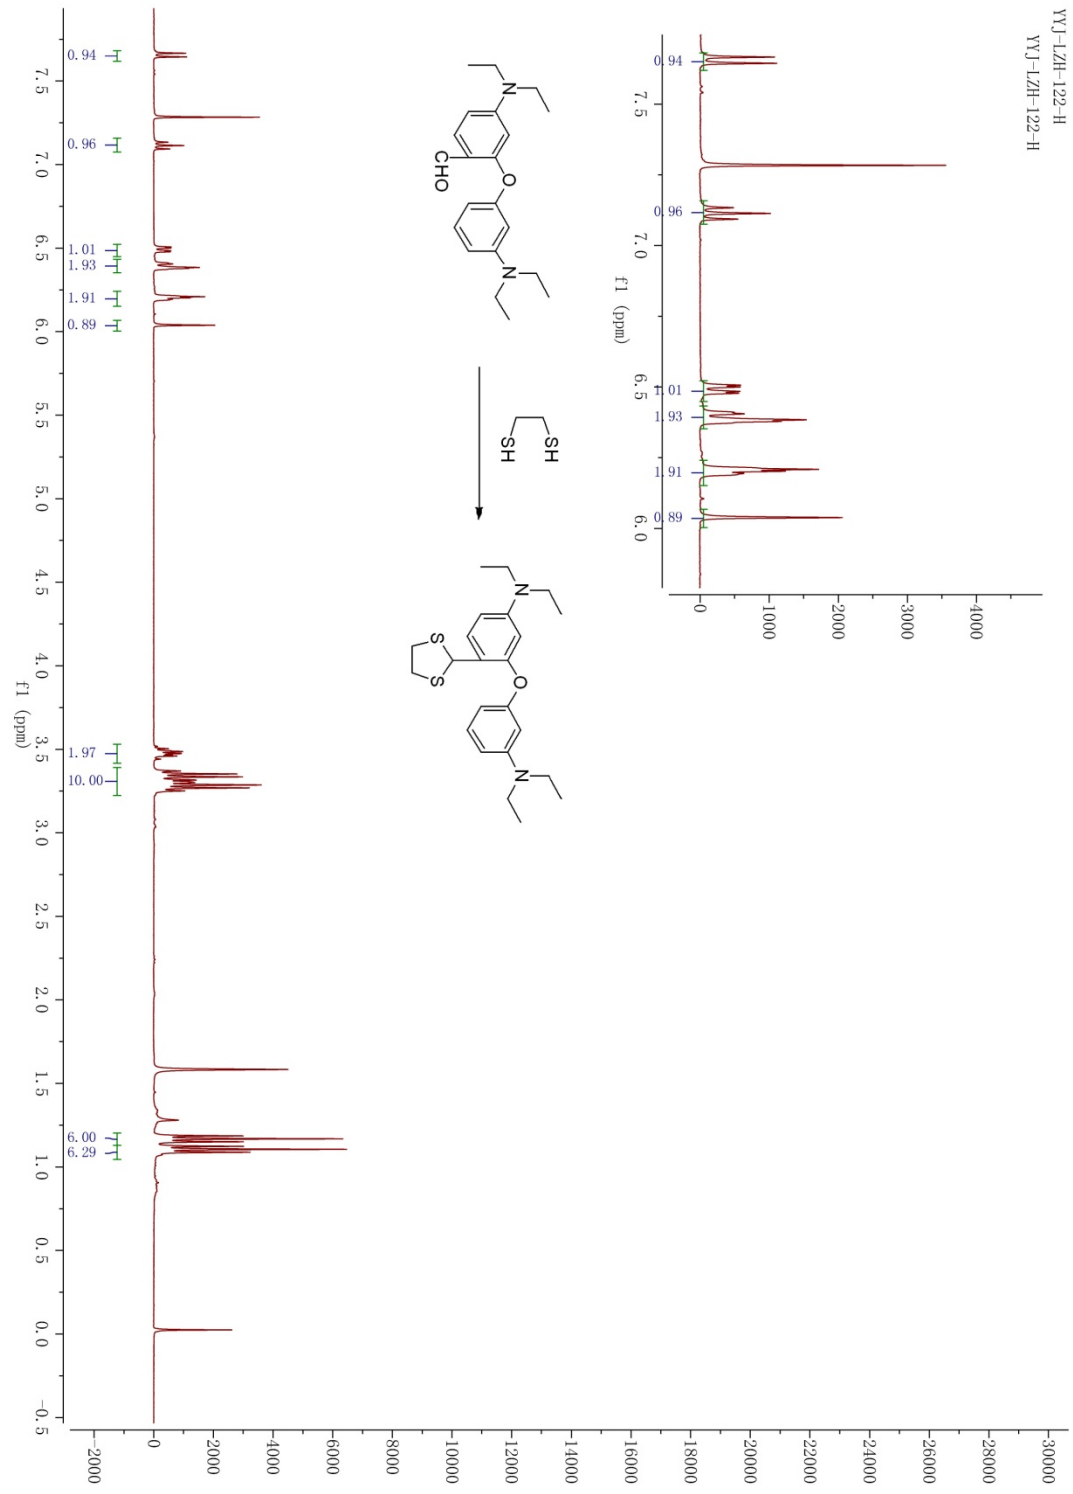

Figure S3: <sup>1</sup>H-NMR of compound Hg570

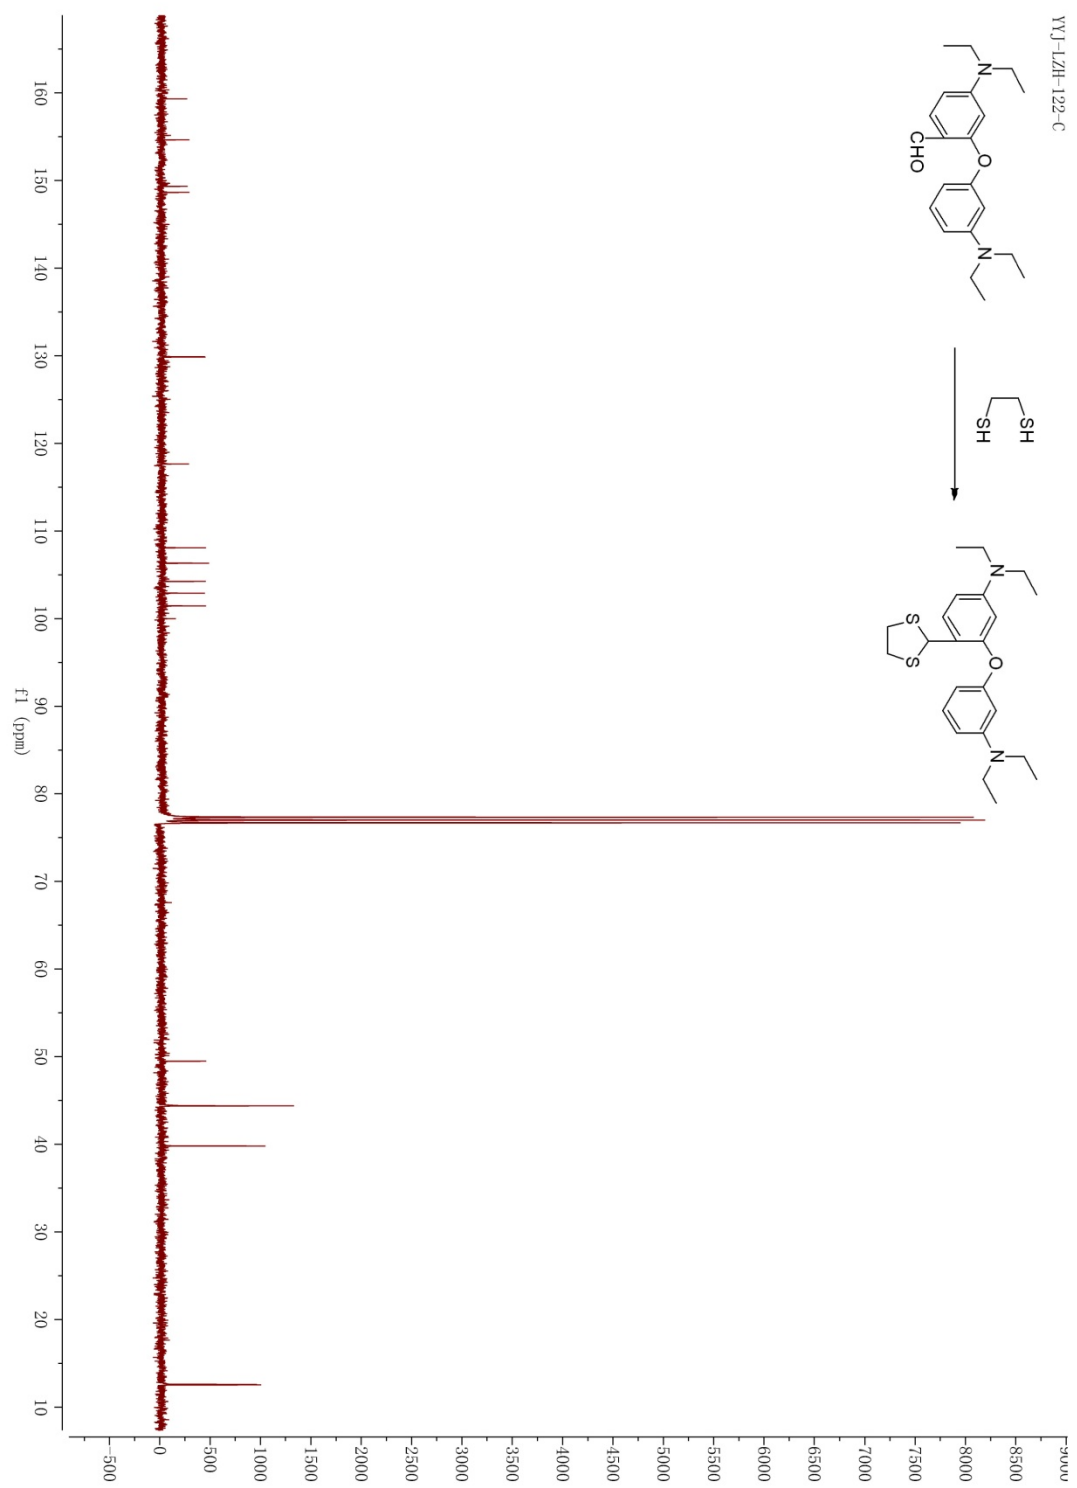

Figure S4:  $^{13}\text{C}$ -NMR of compound **Hg570**

Single Mass Analysis

Tolerance = 30.0 mDa / DBE: min = -1.5, max = 100.0

Element prediction: Off

Number of isotope peaks used for i-FIT = 2

Monoisotopic Mass, Even Electron Ions

19 formula(e) evaluated with 1 results within limits (up to 1 best isotopic matches for each mass)

Elements Used:

C: 0-23 H: 0-70 N: 0-2 O: 0-1 S: 0-2

GR-CHEN

ECUST institute of Fine Chem

14-Jul-2014

22:21:00

1: TOF MS ES+

1.83e+003

GR-HXL-570 28 (0.937) Cm (25:28)

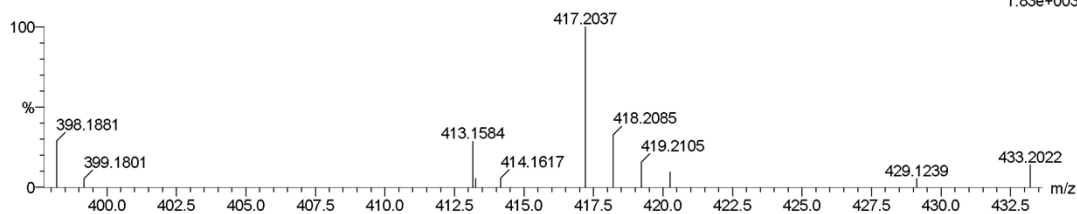

Minimum:

Maximum: 30.0 50.0 -1.5 100.0

| Mass     | Calc. Mass | mDa | PPM | DBE | i-FIT | i-FIT (Norm) | Formula         |
|----------|------------|-----|-----|-----|-------|--------------|-----------------|
| 417.2037 | 417.2034   | 0.3 | 0.7 | 8.5 | 9.3   | 0.0          | C23 H33 N2 O S2 |

Figure S5: HR-MS of compound **Hg570**
